# Supplementary material
Source: PubMed Central journal article supplement (PMC3528096)
Supplement: Supp_Fig1.pdf [file Supp_Fig1.pdf]

## Supplementary Data

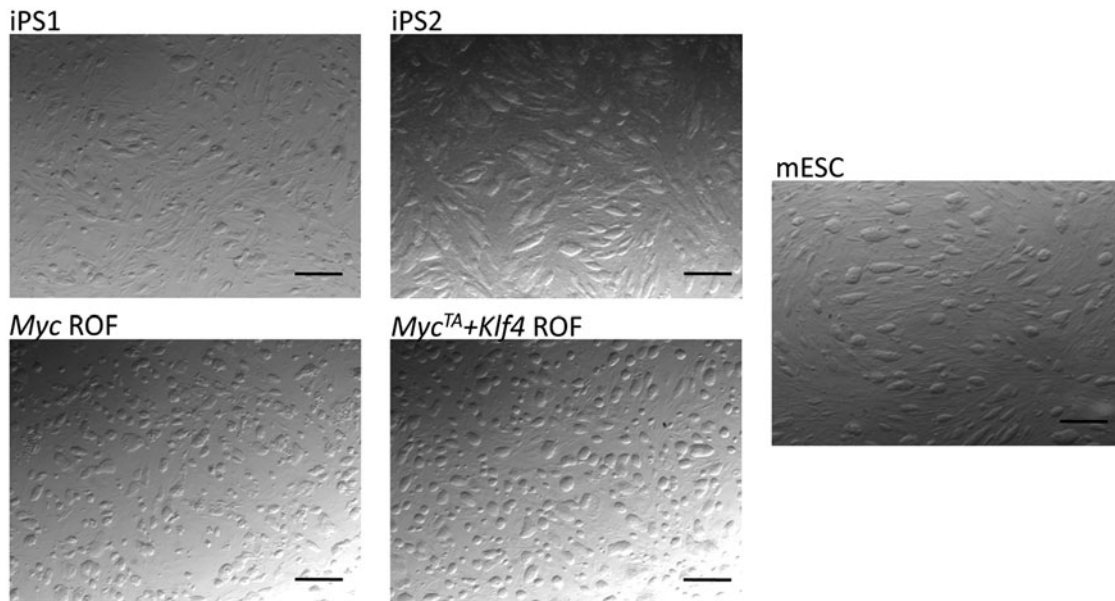

**SUPPLEMENTARY FIG. S1.** Morphology of typical iPSC, ROF, and mESC colonies. Scale bars = 500 μm. iPSCs, induced pluripotent stem cells; ROF, reprogrammed oncogenic foci; mESC, mouse embryonic stem cells.
