# Supplementary material
Source: PubMed Central journal article supplement (PMC3528096)
Supplement: Supp_Fig2.pdf [file Supp_Fig2.pdf]

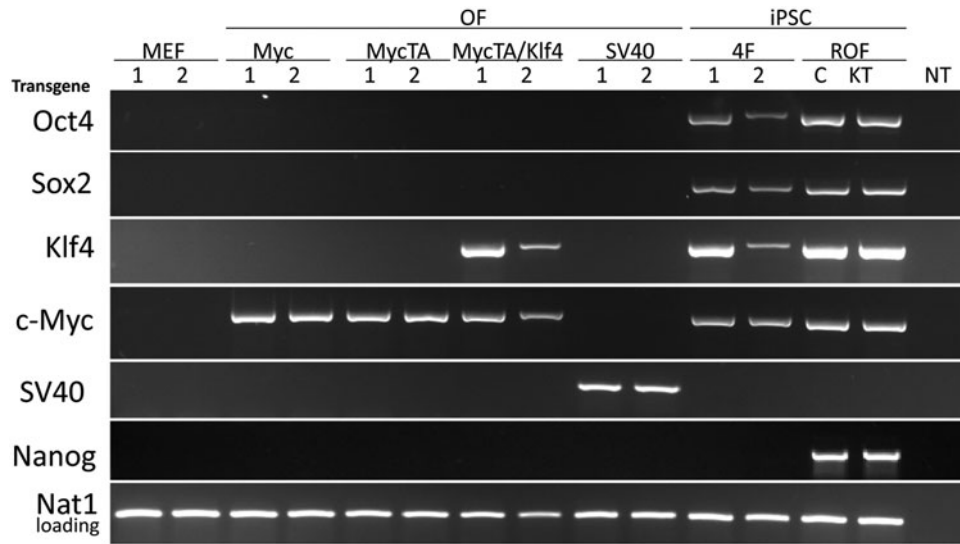

**SUPPLEMENTARY FIG. S2.** Reverse transcriptase-polymerase chain reaction confirmation of transgene expression. Transgene specific primers were used to confirm transgene expression of indicated genes in indicated clones. NT, no template.
