# Supplementary material
Source: PubMed Central journal article supplement (PMC3528096)
Supplement: Supp_Fig3.pdf [file Supp_Fig3.pdf]

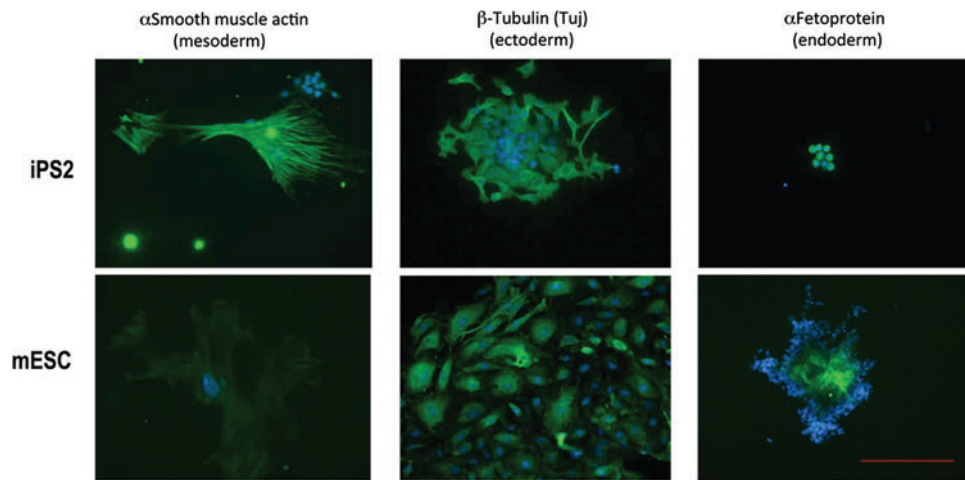

**SUPPLEMENTARY FIG. S3.** IF stain of differentiated iPS2 and mESC. Indicated marker is shown in green, DAPI is shown in *blue*. Scale bar = 200  $\mu\text{m}$ . IF, immunofluorescence; DAPI, 4',6-diamidino-2-phenylindole.
