# Supplementary material
Source: PubMed Central journal article supplement (PMC3528096)
Supplement: Supp_Fig4.pdf [file Supp_Fig4.pdf]

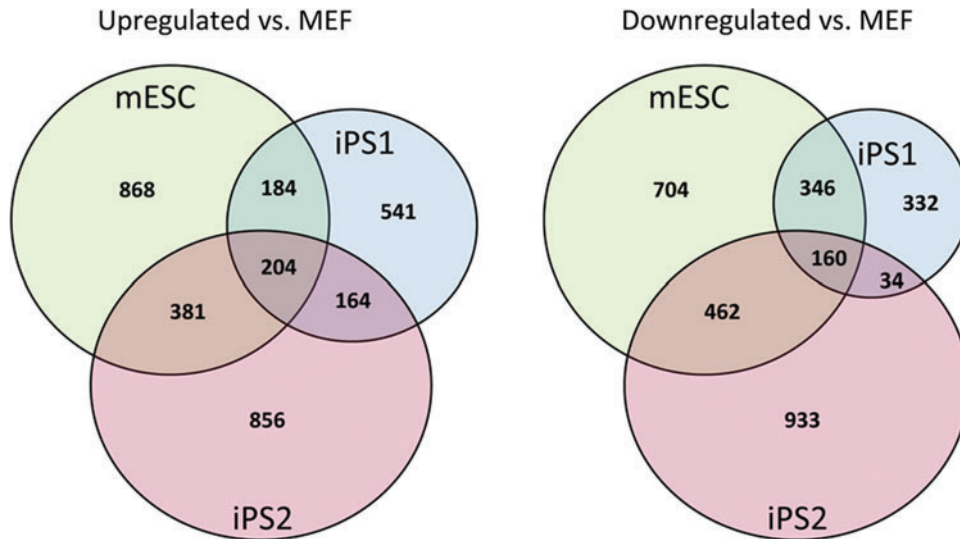

**SUPPLEMENTARY FIG. S4.** Venn diagrams comparing gene lists of up- or downregulated genes (1.5-fold cutoff vs. MEFs) in iPS1, iPS2, and mESC. *P* values for 2-way overlap between conditions include overlapping genes between the 2 indicated cell types and also include genes common to all cell types. All regions of overlap were found to be significant to  $P < 0.0001$ . MEFs, mouse embryonic fibroblasts.
