# Supplementary material
Source: PubMed Central journal article supplement (PMC3528096)
Supplement: Supp_Fig5.pdf [file Supp_Fig5.pdf]

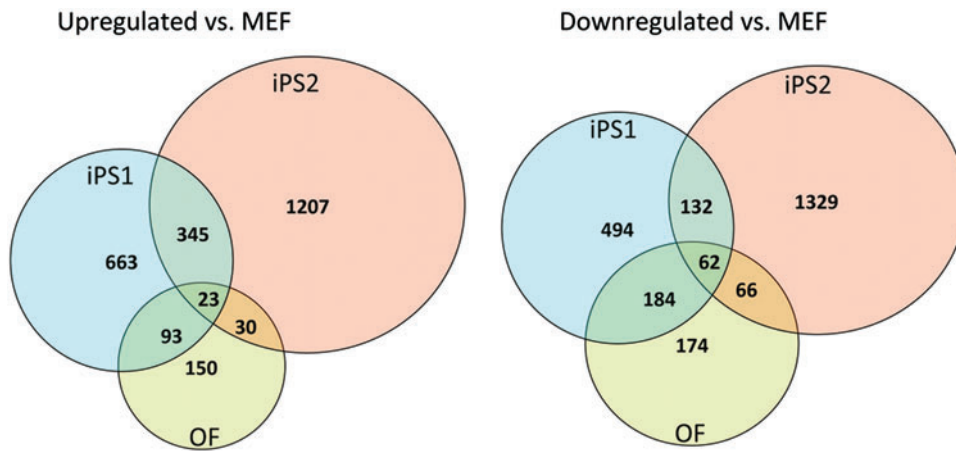

**SUPPLEMENTARY FIG. S5.** Venn diagrams comparing gene lists of up- or downregulated genes (1.5-fold cutoff vs. MEFs) in iPS1, iPS2, and OF. *P* values for 2- way overlap between conditions include overlapping genes between the 2 indicated cell types and also include genes common to all cell types. All regions of overlap were found to be significant to  $P < 0.0001$ . OF, oncogenic foci.
