# Supplementary material
Source: PubMed Central journal article supplement (PMC3528096)
Supplement: Supp_Fig6.pdf [file Supp_Fig6.pdf]

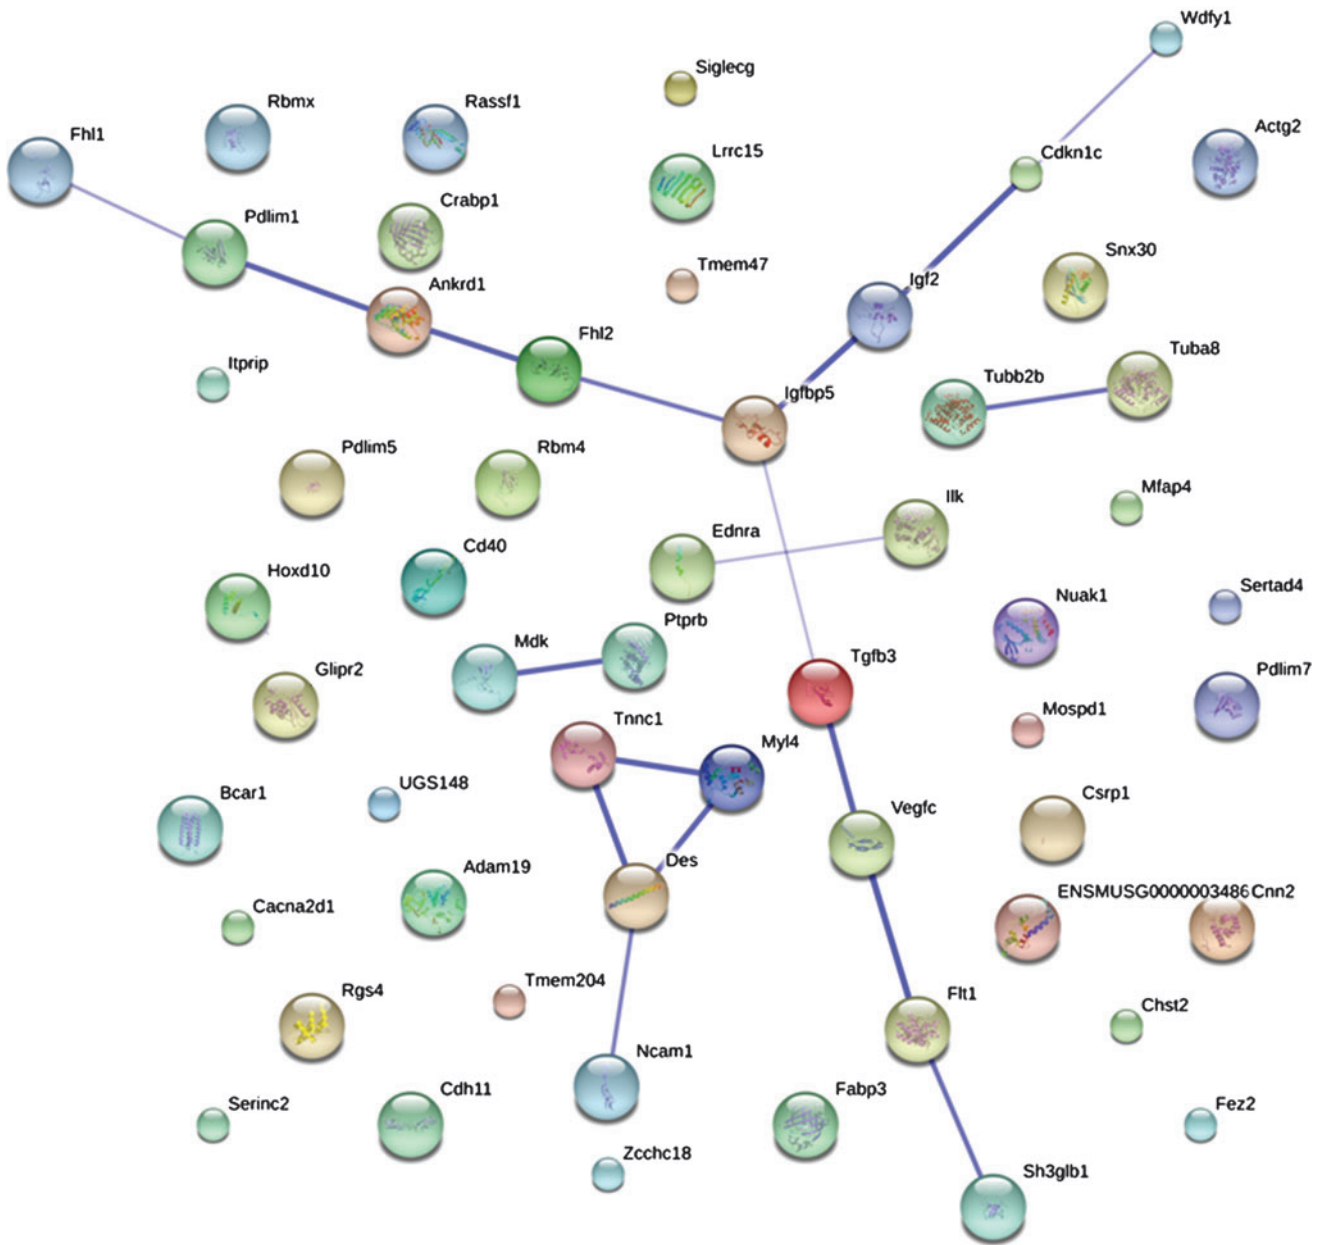

**SUPPLEMENTARY FIG. S6.** STRING network analysis of genes commonly downregulated in iPSC and OF. Nodes are labeled with gene names. Edges represent known or inferred interactions between genes, increased line thickness represents increased confidence level of the interaction between genes.
