# Supplementary material
Source: PubMed Central journal article supplement (PMC3528096)
Supplement: Supp_Fig7.pdf [file Supp_Fig7.pdf]

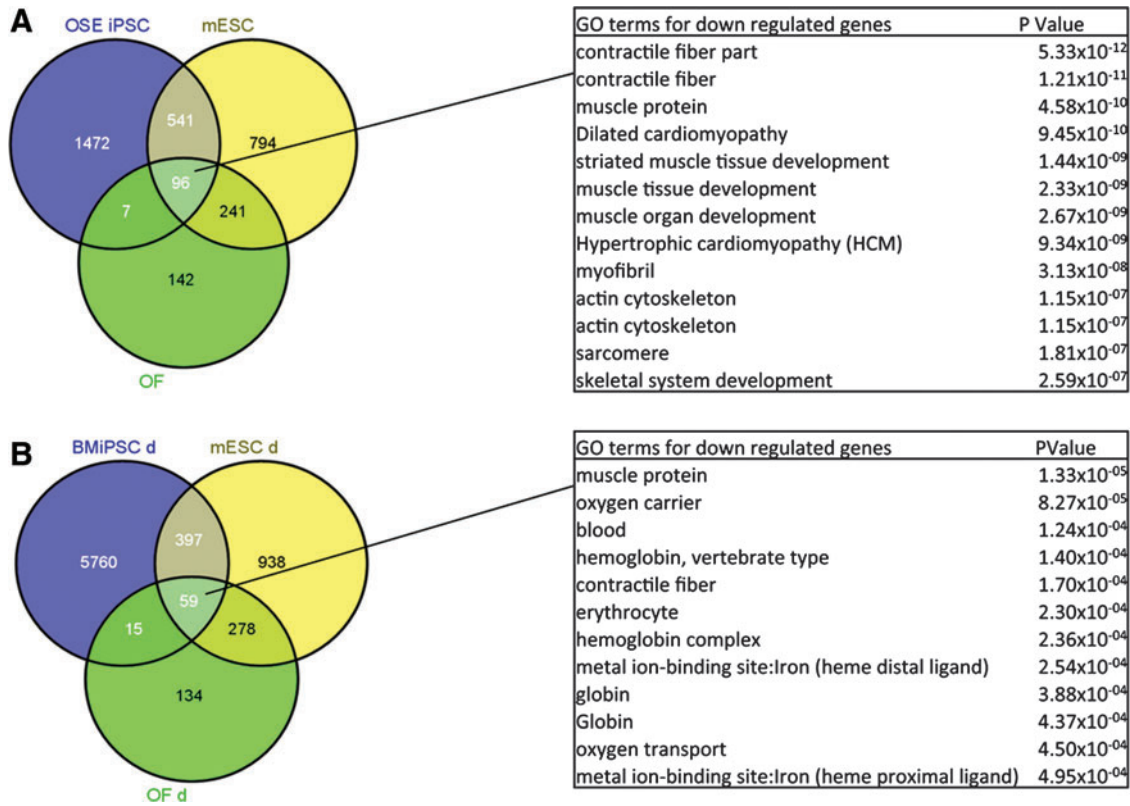

**SUPPLEMENTARY FIG. S7.** Comparison of downregulated genes in either (A) OSE iPSC or (B) BM iPSC to OF and mESC. All regions of overlap were found to be significant to  $P < 0.0001$ . For OSE iPSC, *Oct4*, *Sox2*, and *Esrrb* were used to produce iPSC; For BM iPSC, iPSC derived using bone marrow mononuclear cells.
