# Supplementary material
Source: PubMed Central journal article supplement (PMC3528096)
Supplement: Supp_Fig8.pdf [file Supp_Fig8.pdf]

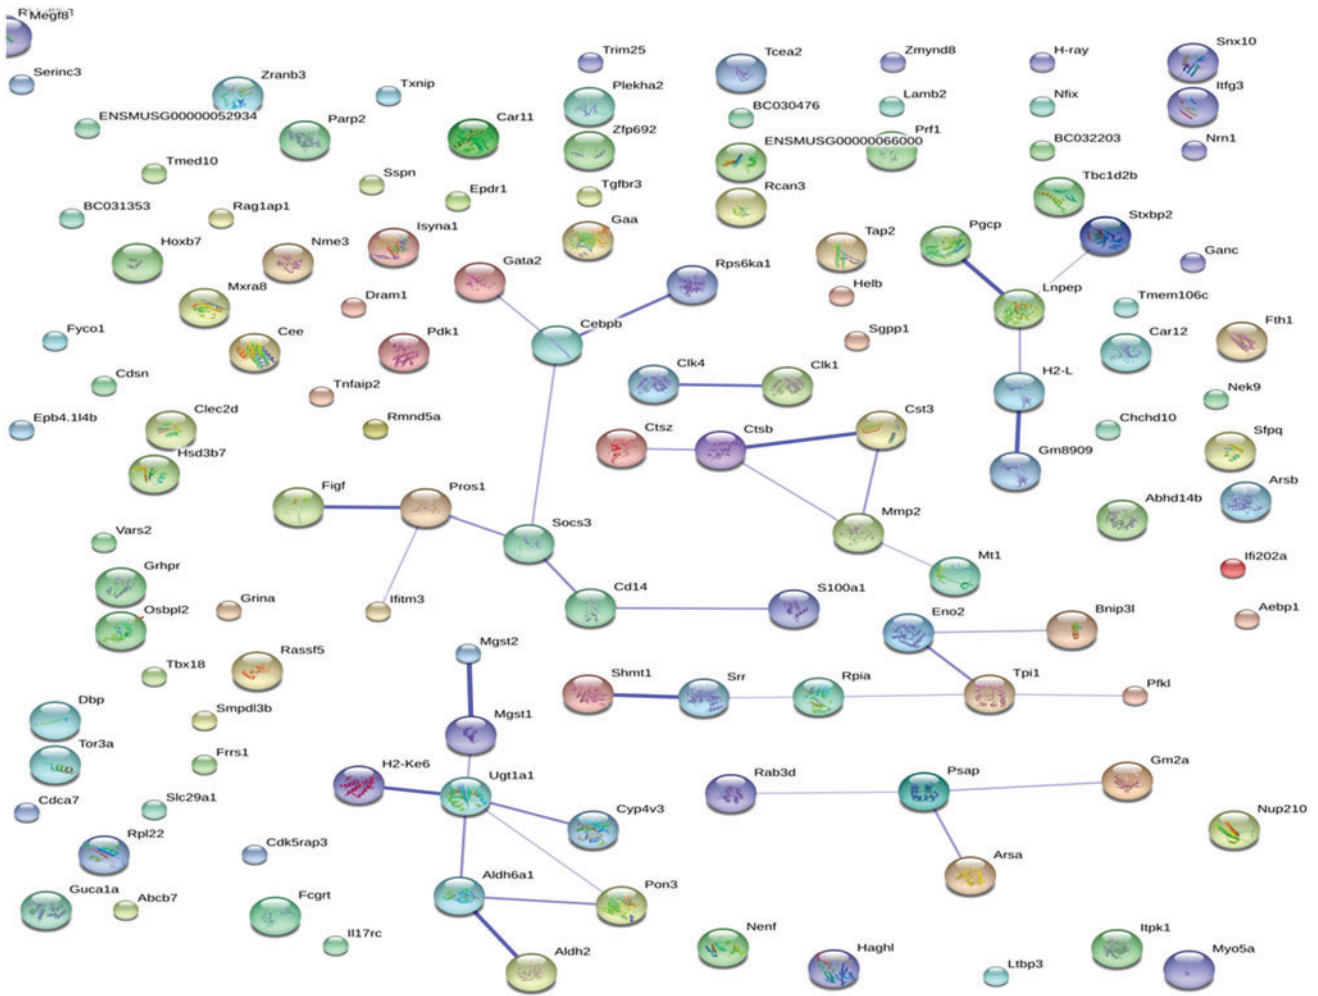

**SUPPLEMENTARY FIG. S8.** STRING network analysis of genes greater than 1.5-fold upregulated in OF and either iPS1, iPS2, or both. A line connecting 2 nodes (genes) indicates a functional interaction. The thickness of the lines connecting the nodes denotes the confidence of the interaction.
