# Supplementary material
Source: PubMed Central journal article supplement (PMC3528096)
Supplement: Supp_Fig9.pdf [file Supp_Fig9.pdf]

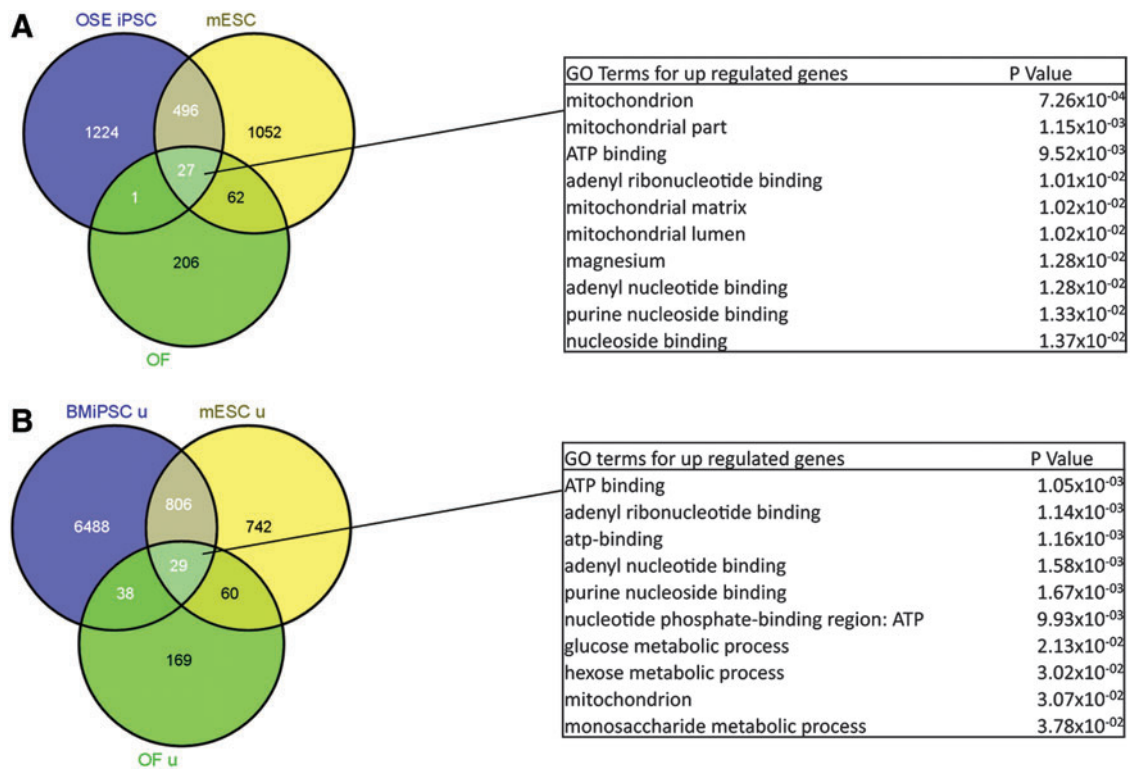

**SUPPLEMENTARY FIG. S9.** Comparison of upregulated genes in either (A) OSE iPSCs or (B) BM iPSCs to OF and mESCs. All regions of overlap were found to be significant to  $P < 0.0001$ .
