# Supplementary material
Source: PubMed Central journal article supplement (PMC3528096)
Supplement: Supp_Fig10.pdf [file Supp_Fig10.pdf]

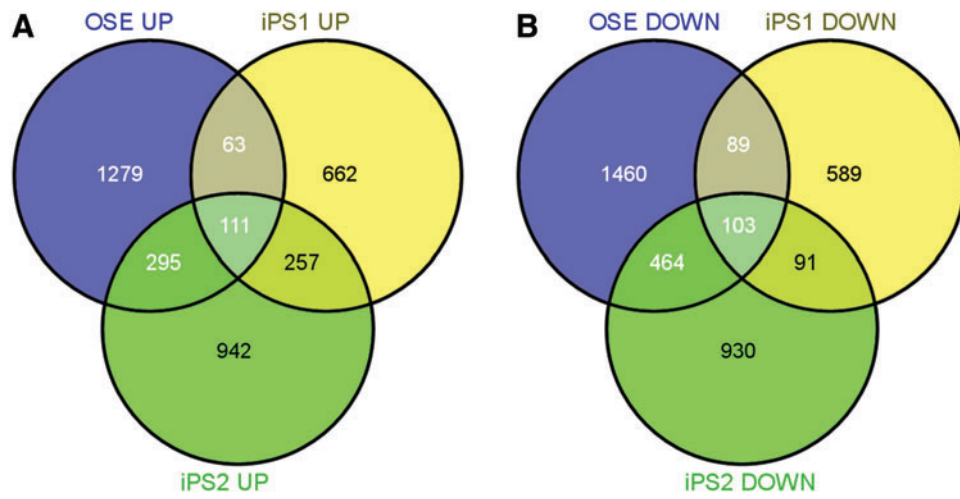

**SUPPLEMENTARY FIG. S10.** Comparison of iPS1 and iPS2 to OSE iPSCs. **(A)** Genes upregulated 1.5-fold or greater as compared to parental cells. **(B)** Genes downregulated 1.5-fold or greater as compared to parental cells.
