# Supplementary material
Source: PubMed Central journal article supplement (PMC3528096)
Supplement: Supp_Fig11.pdf [file Supp_Fig11.pdf]

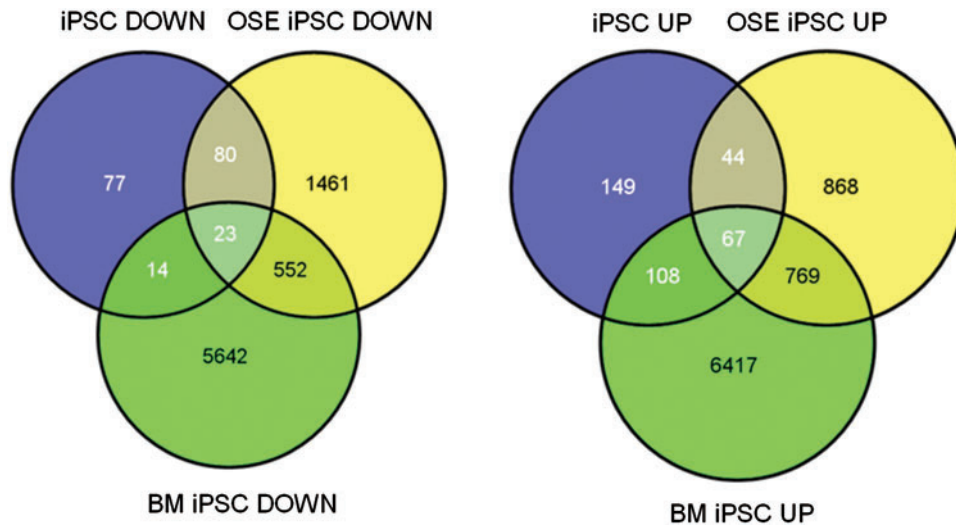

**SUPPLEMENTARY FIG. S11.** Comparisons of up- and downregulated genes between our iPSC, OSE iPSC, and BM iPSC as compared to experimental controls. All regions of overlap were found to be significant to  $P < 0.0001$ .
